# Supplementary material
Source: PubMed Central journal article supplement (PMC4648343)
Supplement: NIHMS736784-supplement-2.pdf [file NIHMS736784-supplement-2.pdf]

## Supplementary Appendix

### Table of Contents

|                                                                                       |    |
|---------------------------------------------------------------------------------------|----|
| Members of the Survey Team.....                                                       | 1  |
| Methods: Survey Conduct and Author Roles .....                                        | 2  |
| Methods: Patient Selection .....                                                      | 3  |
| Methods: <i>Clostridium difficile</i> Infection Definition .....                      | 4  |
| Methods: Use of Antimicrobial Therapy as a Screening Tool for Patients with HAIs..... | 5  |
| Methods: Analysis.....                                                                | 6  |
| Discussion: Limitations.....                                                          | 8  |
| Acknowledgments .....                                                                 | 9  |
| Figure S1.....                                                                        | 10 |
| Table S1.....                                                                         | 11 |
| Table S2.....                                                                         | 12 |
| References.....                                                                       | 13 |

## **Members of the Survey Team**

In addition to the authors, the other members of the Emerging Infections Program (EIP) Healthcare-Associated Infections (HAI) and Antimicrobial Use Prevalence Survey Team are as follows:

Sarah Jackson, MPH and Julie Duran, MPH (Colorado Department of Public Health and Environment, Denver, CO); Richard Melchreit, MD and Richard Rodriguez, MPH (Connecticut Department of Public Health, Hartford, CT); Lewis Perry, RN, MPH and Nancy White, RN, BSN, CIC (Georgia Emerging Infections Program, Atlanta, GA); Katie Richards, MPH (Maryland Department of Health and Mental Hygiene, Baltimore, MD); Jane Harper, BSN, MS, CIC, Jean Rainbow, RN, MPH, and Linn Warnke, RN, MPH (Minnesota Department of Health, St. Paul, MN); Joan Baumbach, MD, MPH, MS (New Mexico Department of Health, Santa Fe, NM); Cathy Concannon, MPH and Gail Quinlan, RN, MS, CIC (New York - Rochester Emerging Infections Program/University of Rochester, Rochester, NY); Margaret Cunningham, MPH, Valerie Ocampo, RN, MIPH, and Jennifer Tujo, RN, MSN, MPA, CIC (Oregon Public Health Authority, Portland, OR); and Matthew Crist, MD, MPH (Tennessee Department of Health, Nashville, TN).

## **Methods: Survey Conduct and Author Roles**

The survey was supported through a cooperative agreement with the Emerging Infections Programs, with funds from the CDC's Division of Healthcare Quality Promotion, Division of Preparedness and Emerging Infections, and Office of Antimicrobial Resistance. There were no agreements concerning data confidentiality between the CDC and the authors (some of whom are U.S. federal government employees) or their institutions. All authors vouch for the accuracy and completeness of the data; the first two authors (Shelley Magill and Jonathan Edwards) performed and vouch for the accuracy of the data analysis.

The survey was designed and coordinated by Shelley Magill, Jonathan Edwards, Laura McAllister-Hollod, and Scott Fridkin, with input from other authors. Shelley Magill and Laura McAllister-Hollod developed and conducted survey training. Training in the use of the National Healthcare Safety Network (NHSN) HAI definitions was conducted with assistance from other CDC staff included in the "Acknowledgments" section (below). Survey activities, including data collection, were performed and supervised by EIP HAI and Antimicrobial Use Prevalence Survey Team members and individuals included in the "Acknowledgments" section. Authors participating in data collection include Wendy Bamberg, Meghan Maloney, Joelle Nadle and Deborah Thompson. Authors supervising survey activities and data collection in the EIP sites include Wendy Bamberg, Zintars Beldavs, Ghinwa Dumyati, Marion Kainer, Ruth Lynfield, Joelle Nadle, Susan Ray, Deborah Thompson, and Lucy Wilson. Shelley Magill wrote the first draft of the paper. All authors critically reviewed and provided comments on the first draft, and read and approved the final version. All authors agreed to publish the paper.

## **Methods: Patient Selection**

To reduce the burden of survey activities on the hospital survey dates, the random selection of acute care inpatients to be surveyed in each participating hospital was performed through use of a randomly sorted acute care hospital bed number list. In advance of the survey date, each hospital submitted a list of its acute care inpatient units and the active, acute care bed numbers on those units to its EIP Team (EIPT). With the assistance of CDC project staff, EIPTs mapped each hospital's acute care inpatient units to appropriate NMSN location codes (e.g., adult medical intensive care unit, pediatric surgery ward, well newborn nursery, etc.). EIPTs randomly sorted each hospital's complete list of active, acute care bed numbers using a tool such as the Microsoft Excel® random number generator. This randomly sorted list was used by Primary Teams (PTs) to match acute care bed numbers to the identifiers of patients occupying those beds on the morning of the survey date, obtained from the daily inpatient census generated by PTs between midnight and 0800 hours. PTs and/or EIPTs reviewed medical records of patients matched to the randomly sorted bed number list, starting at the top of the bed number list and working down until the records of 75 patients had been reviewed in small and medium hospitals, or the records of 100 patients had been reviewed in large hospitals. PTs and/or EIPTs ensured that each patient matched to a sampled active, acute care bed number met eligibility criteria for the survey. Empty bed numbers on the randomly-sorted list or bed numbers occupied by ineligible patients (e.g., non-acute care patients) were replaced by proceeding down the list in order to other bed numbers until the target patient sample size was achieved.

## **Methods: *Clostridium difficile* Infection Definition**

For surveyed patients with positive laboratory test results indicating *Clostridium difficile* infection (CDI) who did not meet one of the NHSN “Gastrointestinal” (GI) infection definitions, a prevalence survey-specific CDI infection definition was applied. This definition was consistent with laboratory aspects of previously published definitions<sup>1</sup> and case definitions for population-based surveillance,<sup>2</sup> and required a positive result for a laboratory assay for *C. difficile* toxin A and/or B, or a toxin-producing *C. difficile* organism, detected in a stool sample by culture or other means. The test specimen must have been collected after > 48 hours (or 3 calendar days) of hospitalization, with no evidence that CDI was present or incubating on admission to the survey hospital, or the test specimen could have been collected from the patient in an outpatient setting or during the first 48 hours (or 3 calendar days) of hospitalization when there was a previous stay in the survey hospital within 28 days prior to specimen collection and when there was no stay of >24 hours (or 2 calendar days) in another healthcare facility during the 28 days prior to specimen collection.

## **Methods: Use of Antimicrobial Therapy as a Screening Tool for Patients with HAIs**

Patients were considered to be on antimicrobial drugs at the time of the survey if they were receiving or scheduled to receive an antimicrobial drug on the survey date or the calendar day prior to the survey date, as determined through review of paper or electronic medication administration records and operating room records. Dialysis patients were considered to be on antimicrobial drugs at the time of the survey if they received or were scheduled to receive antimicrobial drugs on the survey date or the calendar day prior to the survey date, or if they received vancomycin or aminoglycoside antibiotics in the 4 calendar days prior to the survey date.

EIPs retrospectively reviewed the medical records of patients on antimicrobial drugs at the time of the survey, or for whom antimicrobial drug administration information was unknown at the time of the survey, to collect additional information about the rationale for antimicrobial drug use (Figure S1). For patients who were determined to be receiving antimicrobial drugs for treatment of active infections or for no documented rationale, the EIPs performed additional medical record review to collect information on HAIs (Figure S1).

## Methods: Analysis

To identify factors associated with HAI prevalence, we performed univariate and multivariable log-binomial regression modeling; those factors significantly associated with HAIs in univariate analyses (two-sided P value  $\leq 0.05$ ) were included in multivariable models. Factors significantly associated with HAIs in a multivariable model remained in the model. Different parameterizations of two factors—patient age and time from admission to survey date (TAS)—were evaluated to determine the model with the best fit, as determined by the likelihood ratio test and lowest Akaike Information Criterion score.

Because age and TAS were significantly associated with HAI prevalence and were the only two factors in the final regression model for which a corresponding variable was present in the Nationwide Inpatient Sample (NIS) dataset (patient age and hospital length of stay [LOS]), we created strata of age and TAS within which to convert predicted HAI prevalence from the regression model to incidence and generate HAI burden estimates. We used TAS as a proxy for hospital LOS, because actual hospital LOS data were available for only 51% of all surveyed patients. Although hospital admission dates were collected for all surveyed patients (since admission dates were known at the time of the survey), discharge dates were collected only for those patients for whom EIPs performed retrospective medical record review to collect additional data (i.e., those patients receiving or scheduled to receive antimicrobial drugs at the time of the survey, or for whom antimicrobial drug information was not available at the time of the survey). To create proxy LOS categories, we extended the upper bound of TAS categories from the final regression model to the value of the mean hospital LOS for those patients within each TAS category for whom hospital LOS data were available.

Because of low numbers of HAIs in some individual age and TAS/proxy LOS categories, 3 of 6 age categories ( $\leq 0.125$  years, 0.126-1 year, 2-26 years) and 2 of 6 proxy LOS categories (TAS 4 days and TAS 5-6 days) were collapsed into single categories (age 0-26 years and TAS 4-6 days) for the purposes of

estimating HAI burden in these groups of patients, resulting in 20 different age/LOS strata. The predicted HAI prevalence obtained from the regression model within each of the 20 age/LOS strata was converted to incidence as described in the main body of the manuscript.



## **Discussion: Limitations**

Two additional limitations of our survey methods include: 1) use of antimicrobial therapy as a screening tool; and 2) the method for converting prevalence to incidence.

It is possible that we missed HAIs and underestimated HAI prevalence by using antimicrobial therapy as a screening tool to select medical records to review in detail to identify HAIs. Antimicrobial therapy has been evaluated by several investigators as a means of screening patients for HAIs. Older studies showed that antimicrobial therapy was relatively insensitive (41-86%) for identifying patients with HAIs;<sup>3-6</sup> however, in a more recent study<sup>7</sup> and in our own published<sup>8</sup> and unpublished experience, sensitivity exceeded 90%.

We converted HAI prevalence to incidence using the Rhome/Sudderth formula<sup>9</sup> to enable calculation of HAI burden estimates. Others have evaluated this formula in performing prevalence to incidence conversions, and have highlighted the challenges and limitations of this approach.<sup>10, 11</sup> In our survey, because hospital LOS data were available only for patients on antimicrobial therapy, the overall median hospital LOS used in calculating HAI burden may have been an overestimate; this would tend to result in the total number of patients with HAIs being larger than if hospital LOS data had been available for all surveyed patients. However, because using median hospital LOS data from the NIS in the calculations yielded similar results, we do not believe that our results represent a significant overestimate.

## Acknowledgments

We would like to acknowledge the contributions of the following individuals: Deborah Godine, RN, CIC and Celeste Prothro, RN, MPH (California Emerging Infections Program, Oakland, CA); Katherine Allen-Bridson, RN, BSN, MScPH, CIC, Teresa Horan, MPH, Gloria C. Morrell, RN, MS, MSN, CIC, and Shirley Zhang, MSc (Centers for Disease Control and Prevention, Atlanta, GA); Cindy Gross, MT (ASCP), SM, CIC and Dee Higgins, RN, BSN (Georgia Emerging Infections Program, Atlanta, GA); Patricia Lawson, RN, MS, MPH, CIC, LaToya Forrester, MPH and Malorie Givan, MPH (Maryland Department of Health and Mental Hygiene, Baltimore, MD); Emily Hallberg, MPH (Minnesota Department of Health, St. Paul, MN); Monear Makvandi, MPH (New Mexico Department of Health, Santa Fe, NM); Barbara Mooney, BSMB, BSMT (ASCP), CIC (Infection Control Consultants of New Mexico, consultant through *HealthInsight* New Mexico, Albuquerque, NM); Mary Jaco, RN, MSN, CIC (consultant through *HealthInsight* New Mexico, Albuquerque, NM); Jennifer Salazar, LPN (*HealthInsight* New Mexico, Albuquerque, NM); Rebecca Tsay, MPH, MLS, and Anita Gellert, RN (New York - Rochester Emerging Infections Program/University of Rochester, Rochester, NY); Diane Roy, BS (Oregon Public Health Authority, Portland, OR); and Ellen Borchers, MSN, RN, Daniel Muleta, MD, MPH, Loretta Moore-Moravian, RN/BSN, COHN-S/CM, and Dana Jackson, RN, BSN (Tennessee Department of Health, Nashville, TN).

Figure S1. Medical record review process for surveyed patients.

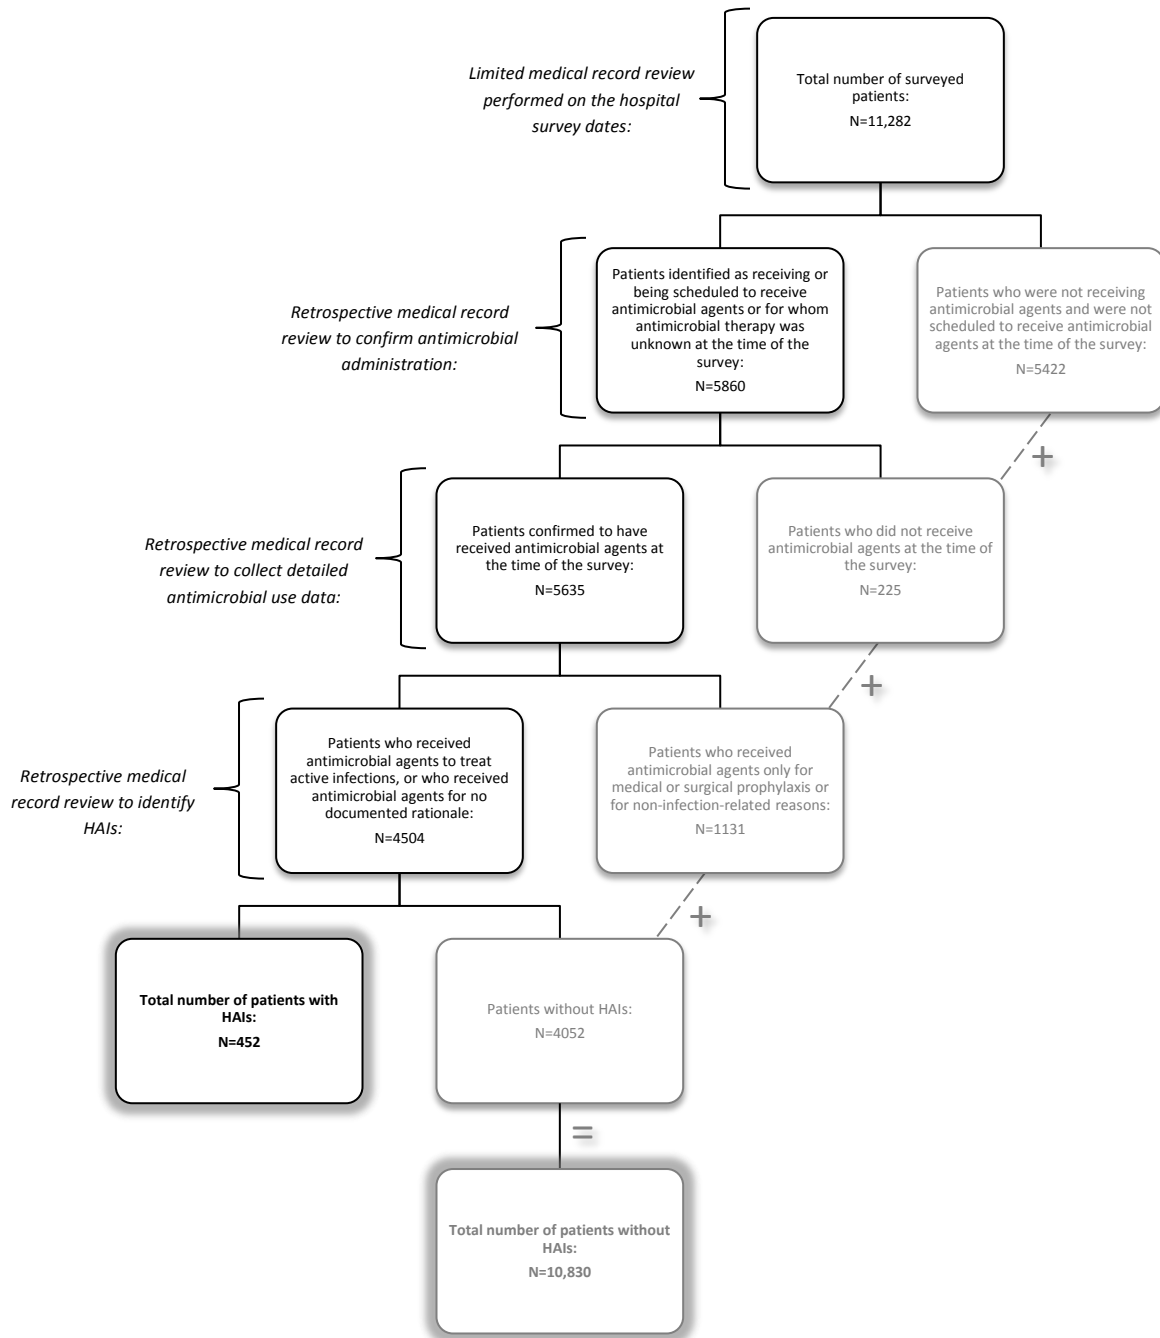

Table S1. Emerging Infections Program sites, survey catchment areas, participating hospitals and patients.

| <b>Site</b>  | <b>Survey Catchment Area</b>                    | <b>No. of Hospitals (%)</b> | <b>No. of Patients (%)</b> |
|--------------|-------------------------------------------------|-----------------------------|----------------------------|
| California   | 3-county San Francisco Bay area                 | 8 (4.4)                     | 514 (4.6)                  |
| Colorado     | 5-county metropolitan Denver area               | 12 (6.6)                    | 877 (7.8)                  |
| Connecticut  | Entire state                                    | 13 (7.1)                    | 945 (8.4)                  |
| Georgia      | 20-county metropolitan Atlanta area             | 22 (12.0)                   | 1395 (12.4)                |
| Maryland     | Entire state                                    | 21 (11.5)                   | 1372 (12.2)                |
| Minnesota    | Entire state                                    | 24 (13.1)                   | 1358 (12.0)                |
| New Mexico   | Entire state                                    | 20 (10.9)                   | 892 (7.9)                  |
| New York     | 9-county Western New York area                  | 23 (12.6)                   | 1545 (13.7)                |
| Oregon       | 10-county metropolitan Portland and Eugene area | 15 (8.2)                    | 898 (8.0)                  |
| Tennessee    | Entire state                                    | 25 (13.7)                   | 1486 (13.2)                |
| <b>Total</b> |                                                 | <b>183 (100)</b>            | <b>11,282 (100)</b>        |

Percentages may add up to >100 due to rounding.

Table S2. Factors independently associated with HAIs in multivariable log-binomial regression modeling.

| Factor                                        | Total<br>No. of<br>Patients | No. of<br>Patients<br>with HAIs | Unadjusted<br>HAI<br>Prevalence,<br>percent | Adjusted Risk Ratio<br>(95% CI) | P<br>value |
|-----------------------------------------------|-----------------------------|---------------------------------|---------------------------------------------|---------------------------------|------------|
| <b>Age<sup>a</sup></b>                        |                             |                                 |                                             |                                 |            |
| ≤0.125 yr                                     | 975                         | 20                              | 2.1                                         | Ref                             | --         |
| 0.126–1 yr                                    | 226                         | 21                              | 9.3                                         | 2.12 (1.19 – 3.76)              | 0.01       |
| 2–26 yr                                       | 1070                        | 33                              | 3.1                                         | 2.20 (1.27 – 3.80)              | 0.005      |
| 27–64 yr                                      | 4567                        | 180                             | 3.9                                         | 2.40 (1.51 – 3.83)              | <0.001     |
| 65–77 yr                                      | 2280                        | 105                             | 4.6                                         | 2.72 (1.69 – 4.38)              | <0.001     |
| >77 yr                                        | 2163                        | 93                              | 4.3                                         | 3.17 (1.97 – 5.12)              | <0.001     |
| <b>Hospital size</b>                          |                             |                                 |                                             |                                 |            |
| All others                                    | 9068                        | 310                             | 3.4                                         | Ref                             | --         |
| Large (≥400 beds)                             | 2214                        | 142                             | 6.4                                         | 1.24 (1.03 – 1.49)              | 0.02       |
| <b>Patient location</b>                       |                             |                                 |                                             |                                 |            |
| All other units                               | 9575                        | 296                             | 3.1                                         | Ref                             | --         |
| Critical care unit                            | 1707                        | 156                             | 9.1                                         | 1.31 (1.04 – 1.67)              | 0.02       |
| <b>Time from admission to<br/>survey date</b> |                             |                                 |                                             |                                 |            |
| ≤3 days                                       | 6850                        | 44                              | 0.6                                         | Ref                             | --         |
| 4 days                                        | 835                         | 16                              | 1.9                                         | 2.59 (1.47 – 4.57)              | 0.001      |
| 5–6 days                                      | 1033                        | 39                              | 3.8                                         | 4.68 (3.05 – 7.19)              | <0.001     |
| 7–8 days                                      | 665                         | 50                              | 7.5                                         | 8.86 (5.93 – 13.23)             | <0.001     |
| 9–14 days                                     | 827                         | 110                             | 13.3                                        | 14.10 (9.89 – 20.09)            | <0.001     |
| ≥15 days                                      | 1072                        | 193                             | 18.0                                        | 18.72 (13.29 – 26.37)           | <0.001     |
| <b>Central line<sup>b</sup></b>               |                             |                                 |                                             |                                 |            |
| No central line                               | 9140                        | 192                             | 2.1                                         | Ref                             | --         |
| Present on survey date                        | 2121                        | 259                             | 12.2                                        | 1.81 (1.48 – 2.21)              | <0.001     |
| <b>Ventilator<sup>c</sup></b>                 |                             |                                 |                                             |                                 |            |
| No ventilator                                 | 10748                       | 357                             | 3.3                                         | Ref                             | --         |
| Present on survey date                        | 527                         | 95                              | 18.0                                        | 1.53 (1.18 – 1.97)              | 0.001      |

<sup>a</sup>Missing for 1 patient without HAI.

<sup>b</sup>Missing for 20 patients without HAIs and 1 patient with HAI.

<sup>c</sup>Missing for 7 patients without HAIs.

## References

- 1) McDonald LC, Coignard B, Dubberke E, Song X, Horan T, Kuty PK; Ad Hoc *Clostridium difficile* Surveillance Working Group. Recommendations for surveillance of *Clostridium difficile*-associated disease. *Infect Control Hosp Epidemiol* 2007;28:140-5.
- 2) Technical information — measuring the scope of *Clostridium difficile* infection in the United States. Atlanta, GA, U.S. Centers for Disease Control and Prevention, 2012. (Accessed on December 18, 2012, at [http://www.cdc.gov/hai/eip/cdiff\\_techinfo.html](http://www.cdc.gov/hai/eip/cdiff_techinfo.html)).
- 3) Wenzel RP, Osterman CA, Hunting KJ, Gwaltney JM. Hospital-acquired infections I: surveillance in a university hospital. *Am J Epidemiol* 1976;103:251-60.
- 4) Feldman L, Lamson M, Gallelli J, Bennett JE. Surveillance of nosocomial infections by antibiotic monitoring. *JAMA* 1979;241:2806-7.
- 5) Glenister HM, Taylor LJ, Bartlett CLR, Cooke EM, Sedgwick JA, Mackintosh CA. An evaluation of surveillance methods for detecting infections in hospital inpatients. *J Hosp Infect* 1993;23:229-42.
- 6) Gastmeier P, Bräuer H, Hauer T, Schumacher M, Daschner F, Rüden H. How many nosocomial infections are missed if identification is restricted to patients with either microbiology results or antibiotic administration? *Infect Control Hosp Epidemiol* 1999;20:124-7.
- 7) Brusaferrò S, Regattin L, Faruzzo A, Grasso A, Basile M, Calligaris L, Scudeller L, Viale P. Surveillance of hospital-acquired infections: a model for settings with resource constraints. *Am J Infect Control* 2006;34:362-6.
- 8) Magill SS, Hellinger W, Cohen J, Kay R, Bailey C, Boland B, et al. Prevalence of healthcare-associated infections in acute care hospitals in Jacksonville, Florida. *Infect Control Hosp Epidemiol* 2012;33:283-91.

- 9) Rhame FS, Sudderth WD. Incidence and prevalence as used in the analysis of the occurrence of nosocomial infections *Am J Epidemiol* 1981;113: 1-11.
- 10) Gastmeier P, Brauer H, Sohr D, et al. Converting incidence and prevalence data of nosocomial infections: results from 8 hospitals. *Infect Control Hosp Epidemiol* 2001;22:31-4.
- 11) Berthelot P, Garnier M, Fascia P, et al. Conversion of prevalence survey data on nosocomial infections to incidence estimates: a simplified tool for surveillance? *Infect Control Hosp Epidemiol* 2007;28:633-6.
